# Supplementary material for: Prognostic Utility of a New Risk Stratification Protocol for Secondary Prevention in Patients Attending Cardiac Rehabilitation
Source: MDPI journal article supplement (doi:10.3390/jcm11071910), 2022-03-30
Supplement: s1 [file s1]

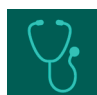**Table S1.** Baseline characteristics between patients who attended cardiac rehabilitation and the whole cohort of ambispective registry.

| Characteristic/Variable               | Total (n = 497) | Included (n = 238) | Not-Included (n = 259) | p Value |
|---------------------------------------|-----------------|--------------------|------------------------|---------|
| <b>Anthropometric</b>                 |                 |                    |                        |         |
| Age (years)                           | 62.0 (54–72)    | 61.0 (53–69)       | 64.0 (55–75)           | 0.006   |
| Women                                 | 93 (18.7)       | 36 (15.1)          | 57 (22.0)              | 0.049   |
| BMI (Kg/m <sup>2</sup> )              | 27.1(24.8–30.1) | 27.2(24.8–29.7)    | 27.0(24.6–30.4)        | 0.945   |
| <b>Risk factors and comorbidities</b> |                 |                    |                        |         |
| Hypertension                          | 281 (56.5)      | 120 (50.4)         | 161 (62.2)             | 0.008   |
| Hyperlipidemia                        | 324 (65.2)      | 157 (66.0)         | 167 (64.5)             | 0.728   |
| Diabetes mellitus                     | 143 (28.8)      | 49 (20.6)          | 94 (36.3)              | <0.001  |
| Current smoker                        | 205 (41.2)      | 92 (38.7)          | 113 (43.6)             |         |
| Previous smoker > 1 year              | 146 (29.4)      | 77 (32.4)          | 69 (26.6)              | 0.529   |
| Previous smoker < 1 year              | 20 (4.0)        | 10 (4.2)           | 10 (3.9)               |         |
| COPD                                  | 40 (8.0)        | 15 (6.3)           | 25 (9.7)               | 0.170   |
| Cerebrovascular disease               | 23 (4.6)        | 10 (4.2)           | 13 (5.0)               | 0.665   |
| Peripheral vascular disease           | 39 (7.8)        | 9 (3.8)            | 30 (11.6)              | 0.001   |
| Anemia                                | 87 (17.5)       | 26 (10.9)          | 61 (23.6)              | <0.001  |
| Chronic kidney disease                | 29 (5.8)        | 8 (3.4)            | 21 (8.1)               | 0.024   |
| CV family history                     | 92 (18.5)       | 45 (18.9)          | 47 (18.1)              | 0.827   |
| Sudden death family history           | 11 (2.2)        | 8 (3.4)            | 3 (1.2)                | 0.095   |
| <b>Diagnostics</b>                    |                 |                    |                        |         |
| STEMI                                 | 220 (44.3)      | 106 (44.5)         | 114 (44.0)             | 0.131   |
| NSTEMI                                | 174 (35.0)      | 91 (38.2)          | 83 (32.0)              | 0.131   |
| Unstable Angina                       | 103 (20.7)      | 41 (17.2)          | 62 (23.9)              |         |
| Previous ACS-MI                       | 99 (19.9)       | 35 (14.7)          | 64 (24.7)              | 0.005   |
| One vessel disease                    | 263 (52.9)      | 135 (56.7)         | 128 (49.4)             |         |
| Two vessels disease                   | 126 (25.4)      | 55 (23.1)          | 71 (27.4)              | 0.412   |
| Three vessels disease                 | 87 (17.5)       | 41 (17.2)          | 46 (17.8)              |         |
| Ejection fraction (%)                 | 59 (52–62)      | 58 (52–63)         | 59 (53–62)             | 0.184   |
| <b>Blood test</b>                     |                 |                    |                        |         |
| Glucose, mg/dL                        | 108 (95–135)    | 107 (95–131)       | 109 (95–135)           | 0.465   |
| Glycated hemoglobin, %                | 5.7 (5.4–6.5)   | 5.6 (5.4–6.1)      | 5.9 (5.4–6.8)          | 0.001   |
| LDL, mg/dL                            | 109 (78–135)    | 113 (87–137)       | 102 (73–125)           | 0.006   |

Data are mean ± SD, median (IQR), or numbers (n) and percentages (%). ACS, Acute coronary syndrome-myocardial infarction; BMI, Body mass index; COPD, Chronic obstructive pulmonary disease; CV, Cardiovascular; MI, myocardial infarction; NSTEMI, non-ST-elevation myocardial infarction; STEMI, ST-elevation myocardial infarction.

**Table S2.** Baseline characteristics between patients who had cardiac readmission and those who did not.

| Characteristic/Variable               | Cardiac Readmission ( <i>n</i> = 25) | Withouth Cardiac Readmission ( <i>n</i> = 213) | <i>p</i> Value |
|---------------------------------------|--------------------------------------|------------------------------------------------|----------------|
| <b>Anthropometric</b>                 |                                      |                                                |                |
| Age (years)                           | 64 (58–70)                           | 61 (53–69)                                     | 0.101          |
| Women                                 | 3 (12.0)                             | 33 (16)                                        | 0.645          |
| BMI (Kg/m <sup>2</sup> )              | 27.6 (24.5–29.6)                     | 27.1 (24.8–29.6)                               | 0.874          |
| <b>Risk factors and comorbidities</b> |                                      |                                                |                |
| Hypertension                          | 15 (60)                              | 105 (49)                                       | 0.311          |
| Hyperlipidemia                        | 11 (44)                              | 146 (69)                                       | 0.014          |
| Diabetes mellitus                     | 4 (16)                               | 45 (21)                                        | 0.549          |
| Current smoker                        | 4 (16)                               | 88 (41.3)                                      |                |
| Previous smoker > 1 year              | 13 (52)                              | 64 (30.0)                                      | 0.067          |
| Previous smoker < 1 year              | 1 (4.0)                              | 9 (4.2)                                        |                |
| COPD                                  | 3 (12.0)                             | 12 (5.6)                                       | 0.215          |
| Cerebrovascular disease               | 1 (4.0)                              | 9 (4.2)                                        | 0.958          |
| Peripheral vascular disease           | 0 (0.0)                              | 9 (4.2)                                        | 0.295          |
| Anemia                                | 6 (24.0)                             | 20 (9.4)                                       | 0.027          |
| Chronic kidney disease                | 2 (8.0)                              | 6 (2.8)                                        | 0.174          |
| CV family history                     | 2 (8.0)                              | 43 (20.2)                                      | 0.141          |
| Sudden death family history           | 0 (0.0)                              | 8 (3.8)                                        | 0.324          |
| <b>Diagnostics</b>                    |                                      |                                                |                |
| STEMI                                 | 9 (36.0)                             | 97 (45.5)                                      |                |
| NSTEMI                                | 10 (40.0)                            | 81 (38.0)                                      | 0.542          |
| Unstable Angina                       | 6 (24.0)                             | 35 (16.4)                                      |                |
| Previous ACS-MI                       | 6 (24.0)                             | 29 (13.6)                                      | 0.165          |
| One vessel disease                    | 8 (32.0)                             | 127 (59.6)                                     |                |
| Two vessels disease                   | 8 (32.0)                             | 47 (22.1)                                      | 0.033          |
| Three vessels disease                 | 9 (36.0)                             | 32 (15.0)                                      |                |
| Ejection fraction (%)                 | 57 (51–64)                           | 58 (52–62)                                     | 0.268          |
| <b>Blood test</b>                     |                                      |                                                |                |
| Glucose, mg/dL                        | 109 (102–156)                        | 106 (95–128)                                   | 0.130          |
| Glycated hemoglobin, %                | 5.7 (5.4–6.5)                        | 5.6 (5.4–6.0)                                  | 0.414          |
| LDL, mg/dL                            | 97 (71–121)                          | 113 (88–139)                                   | 0.063          |

Data are mean ± SD, median (IQR), or numbers (*n*) and percentages (%). ACS, Acute coronary syndrome-myocardial infarction; BMI, Body mass index; COPD, Chronic obstructive pulmonary disease; CV, Cardiovascular; MI, myocardial infarction; NSTEMI, non-ST-elevation myocardial infarction; STEMI, ST-elevation myocardial infarction.
